# Supplementary material for: Post-pulmonary metastasectomy prognosis after curative resection for colorectal cancer
Source: PubMed Central journal article supplement (PMC5482677; doi:10.18632/oncotarget.16616), 2017-03-28
Supplement: oncotarget-08-36566-s001.pdf [file oncotarget-08-36566-s001.pdf]

## **Post-pulmonary metastasectomy prognosis after curative resection for colorectal cancer**

### **SUPPLEMENTARY MATERIALS**

#### **SUPPLEMENTARY TABLE**

**Supplementary Table 1: Comparison of Patients' Demographics, Characteristics of Primary Cancer and Lung Metastases and Treatments Between Rectal Cancer and Colon Cancer Patients**

See Supplementary File 1
